# Supplementary material for: Association of Racial Disparity of Cannabis Possession Arrests Among Adults and Youths With Statewide Cannabis Decriminalization and Legalization
Source: PubMed Central journal article supplement (PMC8727041; doi:10.1001/jamahealthforum.2021.3435), 2021-10-29
Supplement: jamahealthforum-e213435-s001.pdf [file jamahealthforum-e213435-s001.pdf]

## Supplemental Online Content

Sheehan BE, Grucza RA, Plunk AD. Association of racial disparity of cannabis possession arrests among adults and youths with statewide cannabis decriminalization and legalization. *JAMA Health Forum*. 2021;2(10):e213435. doi:10.1001/jamahealthforum.2021.3435

eTable. State data

This supplemental material has been provided by the authors to give readers additional information about their work.

eTable. State data

---

|                                                                                                                                                                                    |
|------------------------------------------------------------------------------------------------------------------------------------------------------------------------------------|
| <b>Legalization States (year of implementation). N=9</b>                                                                                                                           |
| AK (2015), CA (2017),* CO (2013), MA (2017),* ME (2017), MI (2019), OR (2015), VT (2018),* WA (2013)                                                                               |
| <b>Decriminalization States (year of implementation). N=8</b>                                                                                                                      |
| CA (2011),* CT (2011), DE (2019 – adults only), MA (2009),* MD (2014), NH (2018), RI (2013), VT (2013)*                                                                            |
| <b>Excluded States (reason). N=11</b>                                                                                                                                              |
| AR and ND (increased penalties); ME, NE and OH (pre-existing partial decriminalization); KS, KY, LA, NV, NY (partial decriminalization during study period); IL (incomplete data). |
| <b>Control States. N=26</b>                                                                                                                                                        |
| AL, AZ, FL, GA, HI, IA, ID, IN, MN, MO, MS, MT, NC, NE, NJ, NM, OK, SC, SD, TN, TX, UT, VA, WI, WV, WY                                                                             |
| *Indicates a state that implemented both types of policy but not at the same time.                                                                                                 |

---
